# Supplementary material for: Canine idiopathic generalized tremor syndrome, immune-mediated?
Source: Front Vet Sci. 2024 Sep 20;11:1453698. doi: 10.3389/fvets.2024.1453698 (PMC11449864; doi:10.3389/fvets.2024.1453698)
Supplement: Supplementary file 1 [file Data_Sheet_1.XLSX]

## Sheet: Sheet1
Number	Age at presentation (years)	Breed	Sex	Weight (kg)	Neural antibodies	Duration of signs before presentation (days)	Generalised tremor	Head tremor	Intention tremor	Cerebellar ataxia	Vestibular ataxia	Hypermetria	Head tilt	Menace response deficits	Nystagmus	Reduced PLR	Seizures	Hyperthermia	Leukocytosis	Leukopaenia	Anaemia	Haemoconcentration	Thrombocytosis	Thrombocytopenia	CSF TNCC (/mcL)	CSF protein (mg/dL)	CSF RBC (/mcl)	Mixed pleocyosis	Lymphocytic pleocytosis	Albuminocytologic dissociation	CSF-IgA (< 0,2 mg/dL)	Serum IgA (<100)	CSF CRP (< 1 mg/L)	T. gondii- Antibodies	T. gondii PCR	N. caninum Antibodies	N. caninum PCR	Distemper- Antibodies (< 1:20)	Distemper PCR	PAAR	Prednisolone starting dose (mg/kg/day)	Prednisolone tapered in less than 6 months	Prednisolone tapered in more than 6 months	Ciclosporin dose (mg/kg/day)	Diazepam dose	Follow-up Time (months)	Outcome good	Outcome acceptable	Outcome bad
1	3.5	Havanese	FN	6.7	GFAP in CSF (first sample), mGluR1 in serum (second sample)	7	yes	yes	yes	no	no	no	no	no	no	no	no	no	no	no	no	no	no	no	21	17	0	no	yes	no	1.33	295.5	Not determined	Not determined	Not determined	Not determined	Not determined	Not determined	negative	Not determined	2	no	yes	14 (after 3rd relapse)	No information	100	no	yes	no
2	4.5	Irish terrier	F	10.5	mGluR1	1	no	no	yes	yes	yes	yes	no	no	no	no	no	yes	no	no	no	no	no	no	32	102	7	no	yes	no	0.63	169.7	Not determined	positive	negative	negative	negative	0.0972222	negative	Not determined	1	yes	no	10	No information	36	yes	no	no
3	1.2	Havanese	F	3.5	mGluR1	4	yes	yes	yes	no	yes	no	no	no	no	no	no	yes	no	no	no	no	no	no	266	26	0	no	yes	no	0.59	Not determined	7	negative	negative	negative	negative	negative	negative	Not determined	4	no information	no information	not administred	1.5 mg/kg once	2	yes	no	no
4	1	Cockapoo	F	10.4	non specific	7	yes	yes	yes	no	yes	no	yes	yes	yes	no	no	no	no	no	no	no	no	no	18	6.2	0	yes	no	no	Not determined	Not determined	Not determined	negative	Not determined	negative	Not determined	Not determined	Not determined	Not determined	2	yes	yes	not administred	5mg TID	4	yes	no	no
5	2.3	Dachshund	FN	9.9	non specific	1	yes	yes	yes	yes	no	yes	no	no	yes	no	no	yes	no	no	no	no	no	no	21	17.2	3	yes	no	no	Not determined	Not determined	Not determined	negative	Not determined	negative	Not determined	Not determined	Not determined	Not determined	2	yes	no	not administred	Not given	3	yes	no	no
[truncated: 17 more columns]
